# Supplementary material
Source: Research Square preprint supplement (doi:10.21203/rs.3.rs-8980645/v1)
Supplement: Supplementary file 1 [file 543d5dcfde075f468adce962.docx]

**Journal of Pharmaceutical Innovation**

Supplementary Material

**Integrating sustainability metrics into analytical decision-making in biopharmaceutical quality control: a case study**

Thallis Martins Souza

*Instituto de Tecnologia em Imunobiológicos (Bio-Manguinhos), Fundação Oswaldo Cruz (Fiocruz), Rio de Janeiro, RJ, Brazil*

**Corresponding author:** TMS. E-mail: [thallismsouza@gmail.com](mailto:thallismsouza@gmail.com). ORCID: <https://orcid.org/0000-0002-9964-0213>

| **Table S1.** The penalty points (PPs) to calculate Analytical Eco-Scale [1]. | | | |
| --- | --- | --- | --- |
| **Category** | **Subtotal PPs** |  | **Total PPs** |
| **Reagents** | | | |
| **Amount** | <10 mL (<10 g) | 1 | Amount PPs x hazard PPs |
| 10-100 mL (10-100 g) | 2 |
| >100 mL (>100 g) | 3 |
| **Hazard** | None | 0 |
| Less severe hazard | 1 |
| More severe hazard | 2 |
| **Instruments** | | | |
| **Energy** | <0.1 kWh per sample | | 0 |
| <1.5 kWh per sample | | 1 |
| >1.5 kWh per sample | | 2 |
| **Occupational hazard** | Hermetization of analytical process | | 0 |
| Emission of vapours to the atmosphere | | 3 |
| **Waste** | None | | 0 |
| <1 mL (<1 g) | | 1 |
| 1-10 mL (1-10 g) | | 3 |
| >10 mL (>10 g) | | 5 |
| Recycling | | 0 |
| Degradation | | 1 |
| Pasivation | | 2 |
| No treatment | | 3 |

**Table S2**. Consumed reagents and sample amounts for assay determination of aromatic amino acids by non-aqueous potentiometric titrations and spectrofluorimetry methods [4].

| **Non-aqueous potentiometric titration** | | | | **Spectrofluorimetry** | | | |
| --- | --- | --- | --- | --- | --- | --- | --- |
| **Consumed amount*** | **PHE** | **TRP** | **TYR** | **Consumed amount*** | **PHE** | **TRP** | **TYR** |
| Sample (mg) | 300 | 450 | 450 | Sample (mg) | 60.0 | 60.0 | 60.0 |
| Formic acid (mL) | 12.0 | 12.0 | 20.0 | KH2PO4 (mg) | 340 | 340 | 340 |
| Glacial acetic acid (mL) | 120 | 200 | 120 | NaOH 0.1 M (mL) | 4.00 | 4.00 | 4.00 |
| HClO4 0.1 M (mL) | 30.0 | 27.0 | 28.0 | Water (mL) | 200 | 200 | 200 |

*mass and volume considering blank + sample batch in triplicate; PHE: phenylalanine; TRP: tryptophan; TYR: tyrosine.

**Table S3**. Analytical Eco-Scale penalty points [2] assigned to the non-aqueous potentiometric titrations and spectrofluorimetric methods [4] for aromatic amino acids assays.

| **Non-aqueous potentiometric titration** | | | | **Spectrofluorimetry** | | | |
| --- | --- | --- | --- | --- | --- | --- | --- |
| **Reagents** | Amount  (A) | Hazardous  (H) | Penalty point  (AxH) | **Reagents** | Amount  (A) | Hazardous  (H) | Penalty point  (AxH) |
| Formic acid | 3 | 2 | 6 | Water | 3 | 0 | 0 |
| Glacial acetic acid | 2 | 2 | 4 | NaOH 0.1 M | 1 | 1 | 1 |
| HClO4 0.1 M | 2 | 2 | 4 | KH2PO4 | 1 | 0 | 0 |
| *reagents (r)* | - | - | 16 | *reagents (r)* | - | - | 1 |
| **Instruments** |  |  |  | **Instruments** |  |  |  |
| Energy consumption | - | - | 0 | Energy consumption | - | - | 0 |
| Occupational hazard | - | - | 3 | Occupational hazard | - | - | 0 |
| Waste generation | - | - | 7 | Waste generation | - | - | 6 |
| *instruments (i)* | - | - | 10 | *instruments (i)* | - | - | 6 |
| Total penalty pointsa  (TPP) | - | - | 26 | Total penalty pointsa  (TPP) | - | - | 7 |
| Analytical Eco-Scale  scoreb (AESS) | - | - | 74 | Analytical Eco-Scale  scoreb (AESS) | - | - | 93 |

aTPP = *r + i*; bAESS = 100- TPP

**Table S4**. Green Analytical Procedure Index (GAPI) parameters for analytical procedures for assay of aromatic amino acids by non-aqueous potentiometric titrations and spectrofluorimetry. [2]

| **Category** | **Non-aqueous potentiometric titrations** | **Spectrofluorimetry** | |
| --- | --- | --- | --- |
| **Sample preparation** | | |
| Collection (1) | Off-line | Off-line | |
| Preservation (2) | None | None | |
| Transport (3) | Required | Required | |
| Storage (4) | Store the sample extracts at -10°C, protected from light. | Samples must be iced or refrigerated at 4°C, protected from light. | |
| Type of method: direct or indirect (5) | Extraction required (liquid-liquid extraction) | Extraction required (liquid-solid extraction) | |
| Scale of extraction (6) | Macroextraction | Macroextraction | |
| Solvents/reagents used (7) | Non green solvents/reagents used | Non green solvents/reagents used | |
| Additional treatments (8) | Simple treatments (extract clean up, solvent removal, etc.) | Simple treatments (extract clean up, solvent removal, etc.) | |
| **Reagent and solvents** | | |
| Amount (9) | 10-100 mL (10-100 g) | 10-100 mL (10-100 g) | |
| Health hazard (10) | NFPA = 2 or 3 (depends on the reagent) | NFPA = 2 or 3 (depends on the reagent). | |
| Safety hazard (11) | Highest NFPA flammability or instability score is 4. | Highest NFPA flammability or instability score is 2 or 3, a special hazard is used. | |
| **Instrumentation** | | |
| Energy (12) | ≤0.1 kWh per sample | ≤0.1 kWh per sample | |
| Occupational hazard (13) | Emission of vapors to the atmosphere | Hermetization of analytical process | |
| Waste (14) | <10 mL (cc. 300 mL) | < 10 mL (cc. 350 mL) | |
| Waste treatment (15) | Recycling possible | Recycling possible | |
| **QUANTIFICATION** | Yes | Yes | |

**Table S5**. White Analytical Chemistry (WAC) decision profile: R (performance), G (environment), and B (practicality) dimension scores and overall whiteness index for non-aqueous potentiometric titration versus spectrofluorimetry.

| **Method: Non-aqueous potentiometric titration** | | | | | |  | **Method: Spectrofluorimetry** | | | | | | | |
| --- | --- | --- | --- | --- | --- | --- | --- | --- | --- | --- | --- | --- | --- | --- |
| R1:  Scope of application | 50.0 | G1:  Toxicity of reagents | 50.0 | B1:  Cost-efficiency | 40.0 |  | R1:  Scope of application | 95.0 | | G1:  Toxicity of reagents | 95.0 | B1:  Cost-efficiency | | 90.0 |
| R2:  LOD and LOQ | 85.0 | G2:  Amount of reagents and waste | 55.0 | B2:  Time-efficiency | 60.0 |  | R2:  LOD and LOQ | 100.0 | | G2:  Amount of reagents and waste | 60.0 | B2:  Time-efficiency | | 70.0 |
| R3:  Precision | 100.0 | G3:  Energy and other media | 100.0 | B3:  Requirements (mean of B3’-B3’’) | 45.0 |  | R3:  Precision | 100.0 | | G3:  Energy and other media | 100.0 | B3:  Requirements (mean of B3’-B3’’) | | 85.0 |
| B3’:  Sample consumption | 50 |  | B3’:  Sample consumption | | 90 |
| B3’’:  Other needs: advanced instruments, skills, facilities | 40 |  | B3’’:  Other needs: advanced instruments, skills, facilities | | 80 |
| R4: Accuracy | 100.0 | G4:  Direct impacts (safety of users) | 98.3 | B4:  Operational simplicity* | 0.0 |  | R4: Accuracy | 100.0 | | G4:  Direct impacts (safety of users) | 80.0 | B4:  Operational simplicity* | | 0.0 |
| **R: 83.8**  **(mean of R1 to R4)** | | **G: 75.8**  **(mean of G1 to G4)** | | **B: 36.3**  **(mean of B1 to B4)** | |  | **98.8**  **(mean of R1-R4)** | | **83.8**  **(mean of G1-G4)** | | | | **61.3**  **(mean of B1 to B4)** | |
| **WAC score: 65.3**  **(mean of R, G and B)** | | | | | |  | **WAC score: 81.3**  **(mean of R, G and B)** | | | | | | | |

*Includes miniaturization, integration/automation, and portability parameters.
